# Supplementary material for: Comparison of 3-Year Outcomes between Early and Delayed Invasive Strategies in Older and Younger Adults with Non-ST-Segment Elevation Myocardial Infarction Undergoing New-Generation Drug-Eluting Stent Implantation
Source: MDPI journal article supplement (doi:10.3390/jcm11164780), 2022-08-16
Supplement: s1 [file s1]

## Supplementary

### **Comparison of 3-year outcomes between early and delayed invasive strategies in older and younger adults with non-ST-segment elevation myocardial infarction undergoing new-generation drug-eluting stent implantation**

Running title: Early vs. delayed strategy in elderly or younger NSTEMI

Yong Hoon Kim<sup>1,\*†</sup>, Ae-Young Her<sup>1,†</sup>, Seung-Woon Rha<sup>2,\*</sup>, Cheol Ung Choi<sup>2</sup>, Byoung Geol Choi<sup>3</sup>, Ji Bak Kim<sup>2</sup>, Soohyung Park<sup>2</sup>, Dong Oh Kang<sup>2</sup>, Ji Young Park<sup>4</sup>, Sang-Ho Park<sup>5</sup> and Myung Ho Jeong<sup>6</sup>

## **Supplementary Online Contents**

**Supplementary material Table S1.** Results of collinearity test for MACCE

**Supplementary material Table S2.** Comparison of baseline characteristics before and after PSM

**Supplementary material Table S3.** Baseline characteristics of the total study population

**Supplementary material Table S4.** Clinical outcomes between the age  $\geq 75$  years and  $< 75$  years groups at 2 years

**Supplementary material Table S5.** Clinical outcomes between the age  $\geq 80$  years and  $< 80$  years groups at 2 years

**Table S1.** Results of collinearity test for MACCE

|                                   | Variance Inflation<br>Factors | Tolerance | Condition Index |
|-----------------------------------|-------------------------------|-----------|-----------------|
| Male                              | 1.312                         | 0.762     | 1.000           |
| LVEF                              | 1.238                         | 0.807     | 3.083           |
| BMI                               | 1.150                         | 0.869     | 3.345           |
| SBP                               | 2.952                         | 0.339     | 3.831           |
| DBP                               | 2.719                         | 0.368     | 4.174           |
| Symptom-to-door time              | 1.025                         | 0.976     | 4.191           |
| Killip class 3                    | 1.575                         | 0.635     | 4.259           |
| Hypertension                      | 1.219                         | 0.820     | 4.317           |
| Diabetes mellitus                 | 1.184                         | 0.845     | 4.382           |
| Dyslipidemia                      | 1.041                         | 0.961     | 4.428           |
| Previous MI                       | 5.025                         | 0.199     | 4.468           |
| Previous PCI                      | 4.992                         | 0.200     | 4.537           |
| Previous HF                       | 1.038                         | 0.964     | 4.630           |
| Previous stroke                   | 1.047                         | 0.955     | 4.772           |
| Current smoker                    | 1.283                         | 0.780     | 4.998           |
| Peak CK-MB                        | 1.147                         | 0.872     | 5.133           |
| Peak troponin-I                   | 1.116                         | 0.896     | 5.243           |
| Serum creatinine                  | 1.282                         | 0.780     | 5.276           |
| eGFR <60mL/min/1.73m <sup>2</sup> | 1.578                         | 0.634     | 5.586           |
| HDL-cholesterol                   | 1.106                         | 0.904     | 5.777           |
| LDL-cholesterol                   | 1.156                         | 0.865     | 6.008           |
| GRACE risk score, > 140           | 2.610                         | 0.383     | 6.729           |
| Clopidogrel                       | 2.918                         | 0.919     | 7.010           |
| Ticagrelor                        | 1.088                         | 0.921     | 7.334           |
| Prasugrel                         | 1.086                         | 0.971     | 7.480           |
| ACEI or ARB                       | 1.030                         | 0.955     | 8.940           |
| Statin                            | 1.047                         | 0.949     | 9.643           |
| Anitocagulant                     | 1.054                         | 0.905     | 11.074          |
| Left main (IRA)                   | 1.105                         | 0.882     | 13.595          |
| Multivessel disease               | 1.134                         | 0.879     | 16.132          |
| Pre-PCI TIMI flow grade 0/1       | 1.137                         | 0.934     | 18.398          |
| GP IIb/IIIa inhibitor             | 1.070                         | 0.890     | 18.788          |
| Transradial approach              | 1.124                         | 0.927     | 21.602          |
| IVUS/OCT                          | 1.078                         | 0.353     | 23.476          |
| FFR                               | 1.019                         | 0.982     | 25.946          |
| Other stents                      | 1.013                         | 0.987     | 30.859          |
| Stent diameter                    | 1.130                         | 0.885     | 35.889          |
| Stent length                      | 2.492                         | 0.401     | 50.954          |
| Number of stents                  | 2.433                         | 0.411     | 86.922          |

MACE, major adverse cardiac events; LVEF, left ventricular ejection fraction; BMI, body mass index; SBP, systolic blood pressure; DBP, diastolic blood pressure; CPR, cardiopulmonary resuscitation; PCI, percutaneous coronary intervention; CABG, coronary artery bypass graft; HF, heart failure; CVA, cerebrovascular accidents; CK-MB, creatine

kinase myocardial band; NT-ProBNP, N-terminal pro-brain natriuretic peptide; eGFR, estimated glomerular filtration rate; LDL, low density lipoprotein; ACEI, angiotensin converting enzyme inhibitor; ARB, angiotensin receptor blocker; BB, beta-blocker; CCB, calcium channel blocker; IRA, infarct-related artery; LAD, left anterior descending coronary artery; LCx, left circumflex coronary artery; RCA, right coronary artery; ACC/AHA, American College of Cardiology/American Heart Association; TIMI, thrombolysis in myocardial infarction; GP, glycoprotein; IVUS, intravascular ultrasound; OCT, optical coherence tomography; FFR, fractional flow reserve; ZES, zotarolimus-eluting stent; EES, everolimus-eluting stent; BES, biolimus-eluting stent.

**Table S2.** Comparison of baseline characteristics before and after PSM

| Variables                                 | Entire patients<br>(n = 4,513)              |                                               |                |       | PSM patients<br>(n = 2,318)  |                                |                |       |
|-------------------------------------------|---------------------------------------------|-----------------------------------------------|----------------|-------|------------------------------|--------------------------------|----------------|-------|
|                                           | Group A1+B1<br>Early invasive<br>(n = 3300) | Group A2+B2<br>Delayed invasive<br>(n = 1213) | <i>p</i> value | SD    | Early invasive<br>(n = 1159) | Delayed invasive<br>(n = 1159) | <i>p</i> value | SD    |
| Male, n (%)                               | 2403 (72.8)                                 | 884 (72.9)                                    | 0.968          | -0.22 | 840 (72.4)                   | 836 (72.1)                     | 0.892          | 0.07  |
| LVEF, %                                   | 54.6 ± 10.1                                 | 53.3 ± 11.8                                   | 0.001          | 1.20  | 53.8 ± 9.9                   | 53.7 ± 11.4                    | 0.633          | 0.09  |
| BMI, kg/m <sup>2</sup>                    | 24.1 ± 3.3                                  | 24.1 ± 3.3                                    | 0.832          | 0.07  | 24.2 ± 3.2                   | 24.1 ± 3.2                     | 0.637          | 0.19  |
| SBP, mmHg                                 | 134.9 ± 25.7                                | 138.5 ± 26.6                                  | <0.001         | -1.38 | 138.8 ± 26.8                 | 138.0 ± 26.4                   | 0.457          | 0.30  |
| DBP, mmHg                                 | 81.3 ± 15.3                                 | 81.8 ± 15.2                                   | 0.331          | -0.33 | 82.1 ± 15.5                  | 81.8 ± 15.1                    | 0.593          | 0.19  |
| Symptom-to-door time, h                   | 6.9 (2.5-24.0)                              | 6.2 (2.1-27.7)                                | 0.019          | -0.92 | 7.0 (2.4-24.4)               | 6.2 (2.1-27.3)                 | 0.847          | -0.22 |
| Killip class 3                            | 246 (7.5)                                   | 132 (10.9)                                    | <0.001         | -1.18 | 104 (9.0)                    | 122 (10.5)                     | 0.357          | -0.51 |
| Hypertension, n (%)                       | 1712 (51.9)                                 | 670 (55.2)                                    | 0.045          | -0.66 | 634 (54.7)                   | 636 (54.9)                     | 0.933          | -0.04 |
| Diabetes mellitus, n (%)                  | 975 (29.5)                                  | 381 (31.4)                                    | 0.226          | -0.42 | 338 (29.2)                   | 357 (30.8)                     | 0.415          | -0.35 |
| Dyslipidemia, n (%)                       | 379 (11.5)                                  | 175 (14.4)                                    | 0.009          | -0.87 | 152 (13.1)                   | 165 (14.2)                     | 0.468          | -0.32 |
| Previous MI, n (%)                        | 209 (6.3)                                   | 86 (7.1)                                      | 0.377          | -0.32 | 76 (6.6)                     | 80 (6.9)                       | 0.804          | -0.12 |
| Previous PCI, n (%)                       | 178 (5.4)                                   | 67 (5.5)                                      | 0.882          | -0.04 | 59 (5.1)                     | 63 (5.4)                       | 0.780          | -0.14 |
| Previous CABG, n (%)                      | 8 (0.2)                                     | 4 (0.3)                                       | 0.774          | -0.20 | 6 (0.5)                      | 3 (0.3)                        | 0.507          | 0.31  |
| Previous HF, n (%)                        | 36 (1.1)                                    | 21 (1.7)                                      | 0.098          | -0.51 | 20 (1.7)                     | 21 (1.8)                       | 0.875          | -0.07 |
| Previous stroke, n (%)                    | 184 (5.6)                                   | 80 (6.6)                                      | 0.198          | -0.42 | 75 (6.5)                     | 71 (6.1)                       | 0.789          | 0.16  |
| Current smokers, n (%)                    | 1245 (37.7)                                 | 411 (33.9)                                    | 0.018          | 0.79  | 403 (34.8)                   | 397 (34.3)                     | 0.827          | 0.10  |
| Peak CK-MB, mg/dL                         | 24.6 (6.7-90.2)                             | 14.4 (4.8-49.3)                               | <0.001         | 2.57  | 15.4 (4.7-50.7)              | 15.0 (4.8-52.9)                | 0.847          | -0.08 |
| Peak Troponin-I, ng/mL                    | 11.9 (2.4-23.0)                             | 4.9 (1.0-20.6)                                | <0.001         | 2.40  | 6.1 (1.3-21.6)               | 5.0 (1.2-21.6)                 | 0.874          | -0.02 |
| Blood glucose, mg/dL                      | 156.1 ± 73.1                                | 160.6 ± 79.9                                  | 0.082          | -0.58 | 157.0 ± 74.4                 | 159.3 ± 77.1                   | 0.465          | -0.30 |
| Hs-CRP (mg/dL)                            | 1.30 ± 2.90                                 | 1.46 ± 5.80                                   | 0.335          | -0.35 | 1.39 ± 3.90                  | 1.32 ± 2.51                    | 0.600          | 0.21  |
| Serum creatinine (mg/L)                   | 1.08 ± 1.21                                 | 1.23 ± 1.54                                   | 0.002          | -1.08 | 1.15 ± 1.34                  | 1.20 ± 1.48                    | 0.453          | -0.35 |
| eGFR <60mL/min/1.73m <sup>2</sup> , n (%) | 763 (23.1)                                  | 355 (29.3)                                    | <0.001         | -1.41 | 286 (24.7)                   | 314 (27.1)                     | 0.308          | -0.55 |

|                              |              |              |        |       |              |              |       |       |
|------------------------------|--------------|--------------|--------|-------|--------------|--------------|-------|-------|
| Total cholesterol, mg/dL     | 180.4 ± 44.0 | 178.1 ± 43.5 | 0.116  | 0.52  | 180.0 ± 43.5 | 178.6 ± 43.5 | 0.440 | 0.32  |
| Triglyceride, mg/L           | 132.7 ± 84.5 | 133.3 ± 89.3 | 0.862  | -0.10 | 137.5 ± 97.9 | 134.1 ± 95.7 | 0.507 | 0.35  |
| HDL cholesterol, mg/L        | 42.6 ± 11.1  | 43.4 ± 11.4  | 0.038  | -0.71 | 43.1 ± 10.9  | 43.3 ± 11.3  | 0.704 | -0.18 |
| LDL cholesterol, mg/L        | 114.6 ± 36.2 | 111.1 ± 35.7 | 0.004  | 0.97  | 112.4 ± 35.2 | 111.9 ± 35.7 | 0.734 | 0.14  |
| GRACE risk score             | 128.0 ± 38.8 | 131.8 ± 42.1 | 0.006  | -0.94 | 129.3 ± 38.5 | 129.5 ± 41.6 | 0.955 | -0.05 |
| > 140, n (%)                 | 1150 (34.8)  | 471 (38.8)   | 0.013  | -0.83 | 432 (37.3)   | 424 (36.6)   | 0.795 | 0.15  |
| Atrial fibrillation, n (%)   | 119 (3.6)    | 57 (4.7)     | 0.099  | -0.55 | 62 (5.3)     | 54 (4.7)     | 0.505 | 0.27  |
| ST-depression, n (%)         | 726 (22.0)   | 260 (21.4)   | 0.715  | 0.15  | 247 (21.3)   | 255 (22.0)   | 0.724 | -0.17 |
| T-wave inversion, n (%)      | 661 (20.0)   | 274 (22.6)   | 0.062  | -0.64 | 282 (24.3)   | 257 (22.2)   | 0.238 | 0.45  |
| Discharge medications, n (%) |              |              |        |       |              |              |       |       |
| Aspirin, n (%)               | 3278 (99.3)  | 1203 (99.2)  | 0.576  | 0.12  | 1150 (99.2)  | 1149 (99.1)  | 0.818 | 0.10  |
| Clopidogrel, n (%)           | 2316 (70.2)  | 946 (78.0)   | <0.001 | -1.79 | 882 (76.1)   | 896 (77.3)   | 0.523 | -0.28 |
| Ticagrelor, n (%)            | 644 (19.5)   | 186 (15.3)   | 0.001  | 1.11  | 200 (17.3)   | 184 (15.9)   | 0.402 | 0.37  |
| Prasugrel, n (%)             | 340 (10.3)   | 81 (6.7)     | <0.001 | 1.29  | 77 (6.6)     | 79 (6.8)     | 0.934 | -0.08 |
| BBs, n (%)                   | 2845 (86.2)  | 1027 (84.7)  | 0.187  | 0.43  | 998 (86.1)   | 987 (85.2)   | 0.621 | 0.25  |
| ACEI or ARBs, n (%)          | 2784 (84.4)  | 968 (79.8)   | <0.001 | 1.20  | 946 (81.6)   | 939 (81.0)   | 0.709 | 0.15  |
| Statin, n (%)                | 3165 (95.9)  | 1142 (94.1)  | 0.012  | 0.83  | 1134 (96.1)  | 1110 (95.8)  | 0.803 | 0.15  |
| Anticoagulant, n (%)         | 61 (1.8)     | 35 (2.9)     | 0.036  | -0.73 | 20 (1.7)     | 24 (2.1)     | 0.593 | -0.29 |
| Infarct-related artery       |              |              |        |       |              |              |       |       |
| Left main, n (%)             | 83 (2.5)     | 48 (4.0)     | 0.012  | -0.85 | 37 (3.2)     | 45 (3.9)     | 0.431 | -0.37 |
| LAD, n (%)                   | 1407 (42.6)  | 524 (43.2)   | 0.735  | 0.12  | 496 (42.8)   | 497 (42.9)   | 0.967 | -0.02 |
| LCx, n (%)                   | 859 (26.0)   | 291 (24.0)   | 0.166  | 0.46  | 283 (24.4)   | 280 (24.2)   | 0.884 | 0.05  |
| RCA, n (%)                   | 951 (28.8)   | 350 (28.9)   | 0.981  | -0.02 | 343 (29.6)   | 337 (29.1)   | 0.820 | 0.11  |
| Multivessel disease, n (%)   | 1782 (54.0)  | 723 (59.6)   | 0.001  | -1.13 | 676 (58.3)   | 682 (58.8)   | 0.800 | 0.05  |
| ACC/AHA type B2/C lesions    | 2786 (84.4)  | 1011 (83.3)  | 0.380  | 0.30  | 996 (85.9)   | 978 (84.4)   | 0.397 | -0.10 |
| Pre-PCI TIMI flow grade 0/1  | 1393 (42.2)  | 376 (31.0)   | <0.001 | 2.34  | 364 (31.4)   | 369 (31.8)   | 0.858 | -0.09 |
| GP IIb/IIIa inhibitor        | 307 (9.3)    | 84 (6.9)     | 0.012  | 0.88  | 87 (7.5)     | 84 (7.2)     | 0.812 | -0.11 |
| Transradial approach         | 1740 (52.7)  | 601 (49.5)   | 0.060  | 0.64  | 585 (50.5)   | 581 (50.1)   | 0.868 | 0.08  |
| IVUS/OCT, n (%)              | 767 (23.2)   | 376 (31.0)   | <0.001 | -1.76 | 321 (27.7)   | 340 (29.3)   | 0.382 | -0.35 |
| FFR, n (%)                   | 60 (1.8)     | 47 (3.9)     | <0.001 | -1.27 | 38 (3.3)     | 34 (2.9)     | 0.720 | 0.23  |

|                                  |              |             |       |       |             |             |       |       |
|----------------------------------|--------------|-------------|-------|-------|-------------|-------------|-------|-------|
| Drug-eluting stents <sup>a</sup> |              |             |       |       |             |             |       |       |
| ZES, n (%)                       | 793 (24.0)   | 297 (24.5)  | 0.752 | -0.12 | 299 (25.8)  | 288 (24.8)  | 0.633 | 0.23  |
| EES, n (%)                       | 1,738 (52.7) | 626 (51.6)  | 0.528 | 0.22  | 591 (51.0)  | 601 (51.9)  | 0.678 | -0.18 |
| BES, n (%)                       | 666 (20.2)   | 269 (22.2)  | 0.143 | -0.49 | 252 (21.7)  | 249 (21.5)  | 0.920 | 0.05  |
| Others, n (%)                    | 103 (3.1)    | 21 (1.7)    | 0.010 | 0.92  | 17 (1.5)    | 21 (1.8)    | 0.624 | -0.24 |
| Stent diameter (mm)              | 3.08 ± 0.42  | 3.06 ± 0.43 | 0.114 | 0.47  | 3.08 ± 0.42 | 3.06 ± 0.42 | 0.298 | 0.47  |
| Stent length (mm)                | 29.4 ± 13.8  | 30.5 ± 14.8 | 0.023 | -0.77 | 31.1 ± 14.9 | 30.4 ± 14.6 | 0.332 | 0.47  |
| Number of stents                 | 1.19 ± 0.44  | 1.24 ± 0.49 | 0.002 | -1.07 | 1.25 ± 0.49 | 1.23 ± 0.48 | 0.521 | 0.41  |

Values are means ± standard deviation or median (interquartile range) or numbers and percentages. The *p* values for continuous data were obtained from the unpaired t-test. The *p* values for categorical data from chi-square or Fisher's exact test.

PSM propensity-score matched, SD standardized mean difference, BMI, body mass index; SBP, systolic blood pressure; DBP, diastolic blood pressure; MI, myocardial infarction; PCI, percutaneous coronary intervention; CABG, coronary artery bypass graft; HF, heart failure; CK-MB, creatine kinase myocardial band; Hs-CRP, high sensitivity C-reactive protein; eGFR, estimated glomerular filtration rate; HDL, high-density lipoprotein; LDL, low-density lipoprotein; GRACE, Global Registry of Acute Coronary Events; BBs, β-blockers; ACEIs, angiotensin-converting enzyme inhibitors; ARBs, angiotensin receptor blockers; LAD, left anterior descending artery; LCx, left circumflex artery; RCA, right coronary artery; ACC/AHA, American College of Cardiology/American Heart Association; TIMI, thrombolysis in myocardial infarction; GP, glycoprotein; IVUS, intravascular ultrasound; OCT, optical coherence tomography; FFR, fractional flow reserve; ZES, zotarolimus-eluting stent; EES, everolimus-eluting stent; BES, biolimus-eluting stent. <sup>a</sup>Drug-eluting stents were composed of ZES (Resolute Integrity stent; Medtronic, Inc., Minneapolis, MN), EES (Xience Prime stent, Abbott Vascular, Santa Clara, CA; or Promus Element stent, Boston Scientific, Natick, MA), and BES (BioMatrix Flex stent, Biosensors International, Morges, Switzerland; or Nobori stent, Terumo Corporation, Tokyo, Japan).

**Table S3.** Baseline characteristics of the total study population.

| Variables                                 | Early invasive<br>(n = 3,300)             |                                           |                   | Delayed invasive<br>(n = 1,213)         |                                         |                   |
|-------------------------------------------|-------------------------------------------|-------------------------------------------|-------------------|-----------------------------------------|-----------------------------------------|-------------------|
|                                           | Group A1<br>Age, ≥65 years<br>(n = 1,612) | Group B1<br>Age, <65 years<br>(n = 1,688) | <i>p</i><br>value | Group A2<br>Age, ≥65 years<br>(n = 641) | Group B2<br>Age, <65 years<br>(n = 572) | <i>p</i><br>value |
| Male, n (%)                               | 927 (57.5)                                | 1476 (87.4)                               | <0.001            | 371 (57.9)                              | 513 (89.7)                              | <0.001            |
| Age, years                                | 74.3 ± 5.8                                | 54.4 ± 7.3                                | <0.001            | 75.0 ± 5.9                              | 54.5 ± 7.2                              | <0.001            |
| LVEF, %                                   | 53.2 ± 10.6                               | 55.9 ± 9.4                                | <0.001            | 51.6 ± 12.3                             | 55.1 ± 10.9                             | <0.001            |
| BMI, kg/m <sup>2</sup>                    | 23.2 ± 3.1                                | 25.0 ± 3.2                                | <0.001            | 23.5 ± 3.3                              | 24.8 ± 3.1                              | <0.001            |
| SBP, mmHg                                 | 133.5 ± 26.4                              | 137.0 ± 25.8                              | <0.001            | 135.4 ± 25.8                            | 139.2 ± 25.8                            | 0.398             |
| DBP, mmHg                                 | 80.4 ± 15.7                               | 83.9 ± 15.8                               | <0.001            | 81.3 ± 14.8                             | 83.8 ± 15.1                             | <0.001            |
| Symptom-to-door time, h                   | 8.0 (3.0-28.4)                            | 5.8 (2.0-19.3)                            | <0.001            | 8.8 (3.0-45.3)                          | 4.5 (1.6-23.9)                          | <0.001            |
| Door-to-balloon time, h                   | 6.0 (2.9-16.1)                            | 6.9 (3.0-16.1)                            | 0.529             | 46.4 (31.8-71.6)                        | 43.2 (29.8-58.6)                        | 0.244             |
| Killip class ≥ 3                          | 181 (11.2)                                | 65 (3.9)                                  | <0.001            | 98 (15.3)                               | 34 (5.9)                                | <0.001            |
| Hypertension, n (%)                       | 1050 (65.1)                               | 662 (39.2)                                | <0.001            | 427 (66.6)                              | 243 (42.5)                              | <0.001            |
| Diabetes mellitus, n (%)                  | 567 (35.2)                                | 408 (24.2)                                | <0.001            | 227 (35.4)                              | 154 (26.9)                              | 0.001             |
| Dyslipidemia, n (%)                       | 154 (9.6)                                 | 225 (13.3)                                | 0.001             | 83 (12.9)                               | 92 (16.1)                               | 0.121             |
| Previous MI, n (%)                        | 136 (8.4)                                 | 73 (4.3)                                  | <0.001            | 48 (7.5)                                | 388 (6.6)                               | 0.578             |
| Previous PCI, n (%)                       | 112 (6.9)                                 | 66 (3.9)                                  | <0.001            | 33 (5.1)                                | 34 (5.9)                                | 0.545             |
| Previous CABG, n (%)                      | 6 (0.4)                                   | 2 (0.1)                                   | 0.170             | 3 (0.5)                                 | 1 (0.2)                                 | 0.627             |
| Previous HF, n (%)                        | 27 (1.7)                                  | 9 (0.5)                                   | 0.002             | 15 (2.3)                                | 6 (1.0)                                 | 0.121             |
| Previous stroke, n (%)                    | 124 (7.7)                                 | 60 (3.6)                                  | <0.001            | 57 (8.9)                                | 23 (4.0)                                | 0.001             |
| Current smokers, n (%)                    | 324 (20.1)                                | 921 (54.6)                                | <0.001            | 102 (15.9)                              | 309 (54.0)                              | <0.001            |
| Peak CK-MB, mg/dL                         | 20.9 (6.4-78.6)                           | 29.0 (7.2-99.0)                           | 0.228             | 13.9 (5.0-42.6)                         | 15.6 (4.6-56.7)                         | 0.640             |
| Peak Troponin-I, ng/mL                    | 10.6 (2.1-22.1)                           | 14.3 (2.8-23.1)                           | 0.146             | 46.7 (11.1-188.9)                       | 53.7 (10.3-211.3)                       | 0.661             |
| Blood glucose, mg/dL                      | 158.6 ± 72.7                              | 153.6 ± 73.4                              | 0.049             | 162.1 ± 80.2                            | 158.9 ± 79.6                            | 0.491             |
| Hs-sensitivity CRP (mg/dL)                | 1.53 ± 3.24                               | 1.07 ± 2.50                               | <0.001            | 1.78 ± 7.72                             | 1.11 ± 2.10                             | 0.035             |
| Serum creatinine (mg/L)                   | 1.12 ± 1.15                               | 1.04 ± 1.27                               | 0.050             | 1.26 ± 1.34                             | 1.21 ± 1.73                             | 0.548             |
| eGFR <60mL/min/1.73m <sup>2</sup> , n (%) | 570 (35.4)                                | 193 (11.4)                                | <0.001            | 269 (42.0)                              | 86 (15.0)                               | <0.001            |



|                              |              |              |        |              |              |        |
|------------------------------|--------------|--------------|--------|--------------|--------------|--------|
| Total cholesterol, mg/dL     | 171.9 ± 43.3 | 188.5 ± 43.1 | <0.001 | 171.7 ± 44.1 | 185.3 ± 41.9 | <0.001 |
| Triglyceride, mg/L           | 111.7 ± 71.8 | 152.7 ± 96.3 | <0.001 | 112.8 ± 82.7 | 156.2 ± 94.3 | <0.001 |
| HDL cholesterol, mg/L        | 43.1 ± 11.4  | 42.1 ± 10.8  | 0.010  | 44.5 ± 82.7  | 42.2 ± 10.6  | <0.001 |
| LDL cholesterol, mg/L        | 108.7 ± 34.7 | 120.2 ± 36.8 | <0.001 | 106.0 ± 35.3 | 116.9 ± 35.3 | <0.001 |
| GRACE risk score             | 151.2 ± 34.5 | 105.8 ± 28.4 | <0.001 | 154.4 ± 36.7 | 106.5 ± 32.3 | <0.001 |
| > 140, n (%)                 | 979 (60.7)   | 171 (10.1)   | <0.001 | 390 (60.8)   | 81 (14.2)    | <0.001 |
| Atrial fibrillation, n (%)   | 93 (5.8)     | 26 (1.5)     | <0.001 | 44 (6.9)     | 13 (2.3)     | <0.001 |
| ST-depression, n (%)         | 392 (24.3)   | 334 (19.8)   | 0.002  | 157 (24.5)   | 103 (18.0)   | 0.006  |
| T-wave inversion, n (%)      | 370 (23.0)   | 291 (17.2)   | <0.001 | 155 (24.2)   | 119 (20.8)   | 0.169  |
| Discharge medications, n (%) |              |              |        |              |              |        |
| Aspirin, n (%)               | 1600 (99.3)  | 1678 (99.4)  | 0.592  | 635 (99.1)   | 568 (99.3)   | 0.649  |
| Clopidogrel, n (%)           | 1251 (77.6)  | 1065 (63.1)  | <0.001 | 540 (84.2)   | 406 (71.0)   | <0.001 |
| Ticagrelor, n (%)            | 283 (17.6)   | 361 (21.4)   | 0.006  | 77 (12.0)    | 109 (19.1)   | 0.001  |
| Prasugrel, n (%)             | 78 (4.8)     | 262 (15.5)   | <0.001 | 24 (3.7)     | 57 (10.0)    | 0.001  |
| BBs, n (%)                   | 1354 (84.0)  | 1491 (88.3)  | <0.001 | 542 (84.6)   | 485 (84.8)   | 0.910  |
| ACEI or ARBs, n (%)          | 1361 (84.4)  | 1423 (84.3)  | 0.924  | 506 (78.9)   | 462 (80.8)   | 0.428  |
| Statin, n (%)                | 1534 (95.2)  | 1631 (96.6)  | 0.034  | 601 (93.8)   | 541 (94.6)   | 0.543  |
| Anticoagulant, n (%)         | 50 (3.1)     | 11 (0.7)     | <0.001 | 25 (3.9)     | 10 (1.7)     | 0.026  |
| Infarct-related artery       |              |              |        |              |              |        |
| Left main, n (%)             | 50 (3.1)     | 33 (2.0)     | 0.045  | 25 (3.9)     | 23 (4.0)     | 0.914  |
| LAD, n (%)                   | 684 (42.4)   | 723 (42.8)   | 0.833  | 286 (44.6)   | 238 (41.6)   | 0.291  |
| LCx, n (%)                   | 400 (24.8)   | 459 (27.2)   | 0.122  | 141 (22.0)   | 150 (26.2)   | 0.085  |
| RCA, n (%)                   | 478 (29.7)   | 473 (28.0)   | 0.301  | 189 (29.5)   | 161 (28.1)   | 0.608  |
| Multivessel disease, n (%)   | 971 (60.2)   | 811 (48.0)   | <0.001 | 423 (66.0)   | 300 (52.4)   | <0.001 |
| ACC/AHA type B2/C lesions    | 1373 (85.2)  | 1413 (83.7)  | 0.246  | 544 (84.9)   | 467 (81.6)   | 0.143  |
| Pre-PCI TIMI flow grade 0/1  | 633 (39.3)   | 760 (45.0)   | 0.001  | 199 (31.0)   | 177 (30.9)   | 0.970  |
| GP IIb/IIIa inhibitor        | 133 (8.3)    | 174 (10.3)   | 0.048  | 43 (6.7)     | 41 (7.2)     | 0.821  |
| Transradial approach         | 781 (48.4)   | 959 (56.8)   | <0.001 | 309 (48.2)   | 292 (51.0)   | 0.323  |
| IVUS/OCT, n (%)              | 346 (21.5)   | 421 (24.9)   | 0.019  | 174 (27.1)   | 202 (35.3)   | 0.002  |
| FFR, n (%)                   | 27 (1.7)     | 33 (2.0)     | 0.603  | 23 (3.6)     | 24 (4.2)     | 0.656  |

|                                  |             |             |        |             |             |       |
|----------------------------------|-------------|-------------|--------|-------------|-------------|-------|
| Drug-eluting stents <sup>a</sup> |             |             |        |             |             |       |
| ZES, n (%)                       | 374 (23.2)  | 419 (24.8)  | 0.276  | 155 (24.2)  | 142 (24.8)  | 0.795 |
| EES, n (%)                       | 860 (53.3)  | 878 (52.0)  | 0.442  | 332 (51.8)  | 294 (51.4)  | 0.891 |
| BES, n (%)                       | 326 (20.2)  | 340 (20.1)  | 0.954  | 144 (22.5)  | 125 (21.9)  | 0.798 |
| Others, n (%)                    | 52 (3.2)    | 51 (3.0)    | 0.764  | 10 (1.6)    | 11 (1.9)    | 0.665 |
| Stent diameter (mm)              | 3.04 ± 0.40 | 3.12 ± 0.43 | <0.001 | 3.03 ± 0.41 | 3.10 ± 0.44 | 0.008 |
| Stent length (mm)                | 30.2 ± 14.4 | 28.6 ± 13.2 | 0.001  | 31.1 ± 14.9 | 29.8 ± 14.5 | 0.129 |
| Number of stents                 | 1.22 ± 0.46 | 1.17 ± 0.42 | 0.002  | 1.26 ± 0.50 | 1.22 ± 0.47 | 0.105 |

Values are means ± standard deviation or median (interquartile range) or numbers and percentages. The *p* values for continuous data were obtained from the unpaired t-test. The *p* values for categorical data from chi-square or Fisher's exact test.

LVEF, left ventricular ejection fraction; BMI, body mass index; SBP, systolic blood pressure; DBP, diastolic blood pressure; MI, myocardial infarction; PCI, percutaneous coronary intervention; CABG, coronary artery bypass graft; HF, heart failure; CK-MB, creatine kinase myocardial band; Hs-CRP, high sensitivity C-reactive protein; eGFR, estimated glomerular filtration rate; HDL, high-density lipoprotein; LDL, low-density lipoprotein; GRACE, Global Registry of Acute Coronary Events; BBs, β-blockers; ACEIs, angiotensin-converting enzyme inhibitors; ARBs, angiotensin receptor blockers; LAD, left anterior descending artery; LCx, left circumflex artery; RCA, right coronary artery; ACC/AHA, American College of Cardiology/American Heart Association; TIMI, thrombolysis in myocardial infarction; GP, glycoprotein; IVUS, intravascular ultrasound; OCT, optical coherence tomography; FFR, fractional flow reserve; ZES, zotarolimus-eluting stent; EES, everolimus-eluting stent; BES, biolimus-eluting stent. <sup>a</sup>Drug-eluting stents were composed of ZES (Resolute Integrity stent; Medtronic, Inc., Minneapolis, MN), EES (Xience Prime stent, Abbott Vascular, Santa Clara, CA; or Promus Element stent, Boston Scientific, Natick, MA), and BES (BioMatrix Flex stent, Biosensors International, Morges, Switzerland; or Nobori stent, Terumo Corporation, Tokyo, Japan).

**Table S4.** Clinical outcomes between the age  $\geq 75$  years and  $< 75$  years groups at 2 years

| Outcomes                     | Group A (Age, $\geq 75$ years, $n = 984$ )    |                                               | Log-rank | Unadjusted<br>HR (95% CI) | $p$   | Multivariable-Adjusted <sup>a</sup><br>HR (95% CI) |       |
|------------------------------|-----------------------------------------------|-----------------------------------------------|----------|---------------------------|-------|----------------------------------------------------|-------|
|                              | Group A1<br>Early invasive<br>( $n = 684$ )   | Group A2<br>Delayed invasive<br>( $n = 300$ ) |          |                           |       | HR (95% CI)                                        | $p$   |
| MACCE                        | 125 (18.3)                                    | 47 (15.7)                                     | 0.340    | 1.177 (0.842-1.646)       | 0.340 | 1.218 (0.867-1.710)                                | 0.255 |
| All-cause death              | 74 (10.8)                                     | 25 (8.3)                                      | 0.229    | 1.320 (0.838-2.076)       | 0.231 | 1.424 (0.897-2.260)                                | 0.133 |
| Cardiac death                | 45 (6.6)                                      | 15 (5.0)                                      | 0.330    | 1.337 (0.746-2.399)       | 0.329 | 1.548 (0.852-2.814)                                | 0.152 |
| Non-cardiac death            | 29 (4.2)                                      | 10 (3.3)                                      | 0.484    | 1.283 (0.630-2.652)       | 0.484 | 1.330 (0.638-2.774)                                | 0.446 |
| Recurrent MI                 | 29 (4.2)                                      | 12 (4.1)                                      | 0.835    | 1.074 (0.548-2.105)       | 0.835 | 1.103 (0.558-2.179)                                | 0.778 |
| Any repeat revascularization | 52 (8.0)                                      | 21 (7.2)                                      | 0.714    | 1.099 (0.662-1.825)       | 0.715 | 1.128 (0.676-1.882)                                | 0.645 |
| Stroke                       | 16 (2.4)                                      | 13 (4.5)                                      | 0.100    | 0.546 (0.263-1.135)       | 0.105 | 1.842 (0.880-3.856)                                | 0.214 |
| ST (definite or probable)    | 4 (0.6)                                       | 2 (0.7)                                       | 0.888    | 0.886 (0.162-4.836)       | 0.869 | 1.125 (0.189-6.701)                                | 0.897 |
| Outcomes                     | Group B (Age, $< 75$ years, $n = 3,529$ )     |                                               | Log-rank | Unadjusted<br>HR (95% CI) | $p$   | Multivariable-Adjusted <sup>a</sup><br>HR (95% CI) |       |
|                              | Group B1<br>Early invasive<br>( $n = 2,816$ ) | Group B2<br>Delayed invasive<br>( $n = 913$ ) |          |                           |       | HR (95% CI)                                        | $p$   |
| MACCE                        | 325 (12.4)                                    | 106 (11.6)                                    | 0.515    | 1.015 (0.864-1.339)       | 0.515 | 1.144 (0.918-1.427)                                | 0.232 |
| All-cause death              | 68 (2.6)                                      | 36 (3.9)                                      | 0.038    | 0.654 (0.436-0.979)       | 0.038 | 1.148 (0.753-1.750)                                | 0.521 |
| Cardiac death                | 31 (1.2)                                      | 22 (2.4)                                      | 0.009    | 0.488 (0.283-0.843)       | 0.010 | 1.463 (0.827-2.588)                                | 0.191 |
| Non-cardiac death            | 37 (1.4)                                      | 14 (1.5)                                      | 0.773    | 0.913 (0.494-1.689)       | 0.773 | 1.154 (0.610-2.183)                                | 0.660 |
| Recurrent MI                 | 73 (2.8)                                      | 25 (2.8)                                      | 0.955    | 1.013 (0.643-1.596)       | 0.955 | 1.077 (0.682-1.703)                                | 0.750 |
| Any repeat revascularization | 249 (9.6)                                     | 72 (8.0)                                      | 0.150    | 1.212 (0.932-1.576)       | 0.151 | 1.245 (0.957-1.620)                                | 0.102 |
| Stroke                       | 45 (1.7)                                      | 19 (2.1)                                      | 0.461    | 0.818 (0.478-1.398)       | 0.462 | 1.133 (0.659-1.948)                                | 0.651 |
| ST (definite or probable)    | 14 (0.5)                                      | 5 (0.6)                                       | 0.955    | 0.971 (0.350-2.696)       | 0.955 | 1.099 (0.391-3.086)                                | 0.858 |

MACCE, major adverse cardiac and cerebrovascular events; ST, stent thrombosis; HR, hazard ratio; CI, confidence interval; LVEF, left ventricular ejection fraction; BMI, body mass index; SBP, systolic blood pressure; DBP, diastolic blood pressure; DM, diabetes mellitus; PCI, percutaneous coronary intervention; HF, heart failure; CK-MB, creatine kinase myocardial band; eGFR, estimated glomerular filtration rate; HDL, high-density lipoprotein; LDL, low-density lipoprotein; GRACE, Global Registry of Acute Coronary Events; ACEIs, angiotensin-converting enzyme inhibitors; ARBs, angiotensin receptor blockers.

<sup>a</sup>Adjusted by male sex, LVEF, BMI, SBP, DBP, symptom-to-door time, Killip class 3, hypertension, DM, dyslipidemia, previous PCI,

previous HF, previous stroke, current smoker, peak CK-MB, peak troponin-I, serum creatinine, eGFR  $<60\text{mL}/\text{min}/1.73\text{m}^2$ , HDL-cholesterol, LDL-cholesterol, GRACE risk score  $>140$ , clopidogrel, ticagrelor, prasugrel, ACEI or ARB, and statin

**Table S5.** Clinical outcomes between the age  $\geq 80$  years and  $< 80$  years groups at 2 years

| Outcomes                     | Group A (Age, ≥80 years, <i>n</i> = 410)   |                                         |          | Log-rank            | Unadjusted | Multivariable-Adjusted <sup>a</sup> |          |
|------------------------------|--------------------------------------------|-----------------------------------------|----------|---------------------|------------|-------------------------------------|----------|
|                              | Group A1                                   | Group A2                                | <i>p</i> |                     |            | HR (95% CI)                         | <i>p</i> |
|                              | Early invasive<br>( <i>n</i> = 280)        | Delayed invasive<br>( <i>n</i> = 130)   |          |                     |            |                                     |          |
| MACCE                        | 61 (21.8)                                  | 21 (16.2)                               | 0.180    | 1.402 (0.884-2.302) | 0.182      | 1.438 (0.872-2.371)                 | 0.154    |
| All-cause death              | 41 (14.6)                                  | 12 (9.2)                                | 0.126    | 1.643 (0.863-3.126) | 0.130      | 1.683 (0.880-3.221)                 | 0.116    |
| Cardiac death                | 27 (9.9)                                   | 7 (5.4)                                 | 0.143    | 1.856 (0.808-4.261) | 0.145      | 1.913 (0.824-4.442)                 | 0.131    |
| Non-cardiac death            | 14 (4.7)                                   | 5 (3.8)                                 | 0.568    | 1.345 (0.484-3.734) | 0.570      | 1.615 (0.534-4.886)                 | 0.396    |
| Recurrent MI                 | 15 (5.6)                                   | 3 (2.3)                                 | 0.160    | 2.423 (0.702-8.371) | 0.162      | 3.057 (0.835-11.19)                 | 0.091    |
| Any repeat revascularization | 20 (7.7)                                   | 8 (6.5)                                 | 0.663    | 1.200 (0.528-2.724) | 0.663      | 1.226 (0.537-2.799)                 | 0.629    |
| Stroke                       | 7 (2.6)                                    | 4 (3.3)                                 | 0.769    | 0.832 (0.243-2.842) | 0.769      | 1.120 (0.321-3.906)                 | 0.859    |
| ST (definite or probable)    | 1 (0.4)                                    | -                                       | -        | -                   | -          | -                                   | -        |
| Outcomes                     | Group B (Age, <80 years, <i>n</i> = 4,103) |                                         |          | Log-rank            | Unadjusted | Multivariable-Adjusted <sup>a</sup> |          |
|                              | Group B1                                   | Group B2                                | <i>p</i> |                     |            | HR (95% CI)                         | <i>p</i> |
|                              | Early invasive<br>( <i>n</i> = 3,020)      | Delayed invasive<br>( <i>n</i> = 1,083) |          |                     |            |                                     |          |
| MACCE                        | 389 (12.9)                                 | 132 (12.2)                              | 0.573    | 1.058 (0.869-1.289) | 0.573      | 1.137 (0.929-1.383)                 | 0.217    |
| All-cause death              | 101 (3.3)                                  | 49 (4.5)                                | 0.074    | 0.734 (0.522-1.032) | 0.075      | 1.014 (0.711-1.446)                 | 0.939    |
| Cardiac death                | 49 (1.6)                                   | 30 (2.7)                                | 0.018    | 0.582 (0.369-0.916) | 0.019      | 1.233 (0.768-1.979)                 | 0.386    |
| Non-cardiac death            | 52 (1.7)                                   | 19 (1.8)                                | 0.921    | 0.974 (0.576-1.647) | 0.921      | 1.253 (0.727-2.160)                 | 0.416    |
| Recurrent MI                 | 87 (2.9)                                   | 34 (3.2)                                | 0.646    | 0.911 (0.613-1.354) | 0.645      | 1.034 (0.694-1.540)                 | 0.871    |
| Any repeat revascularization | 281 (9.5)                                  | 85 (8.0)                                | 0.163    | 1.188 (0.932-1.515) | 0.163      | 1.222 (0.958-1.559)                 | 0.106    |
| Stroke                       | 54 (1.8)                                   | 28 (2.6)                                | 0.102    | 0.685 (0.434-1.081) | 0.104      | 1.359 (0.857-2.154)                 | 0.192    |
| ST (definite or probable)    | 17 (0.6)                                   | 7 (0.7)                                 | 0.748    | 0.866 (0.359-2.088) | 0.748      | 1.017 (0.417-2.481)                 | 0.970    |

MACCE, major adverse cardiac and cerebrovascular events; ST, stent thrombosis; HR, hazard ratio; CI, confidence interval; LVEF, left ventricular ejection fraction; BMI, body mass index; SBP, systolic blood pressure; DBP, diastolic blood pressure; DM, diabetes mellitus; PCI, percutaneous coronary intervention; HF, heart failure; CK-MB, creatine kinase myocardial band; eGFR, estimated glomerular filtration rate; HDL, high-density lipoprotein; LDL, low-density lipoprotein; GRACE, Global Registry of Acute Coronary Events; ACEIs, angiotensin-converting enzyme inhibitors; ARBs, angiotensin receptor blockers.

<sup>a</sup>Adjusted by male sex, LVEF, BMI, SBP, DBP, symptom-to-door time, Killip class 3, hypertension, DM, dyslipidemia, previous PCI,

previous HF, previous stroke, current smoker, peak CK-MB, peak troponin-I, serum creatinine, eGFR  $<60\text{mL}/\text{min}/1.73\text{m}^2$ , HDL-cholesterol, LDL-cholesterol, GRACE risk score  $>140$ , clopidogrel, ticagrelor, prasugrel, ACEI or ARB, and statin
